# Supplementary material
Source: PubMed Central journal article supplement (PMC1851581)
Supplement: pnas_0700789104_5.pdf [file pnas_0700789104_5.pdf]

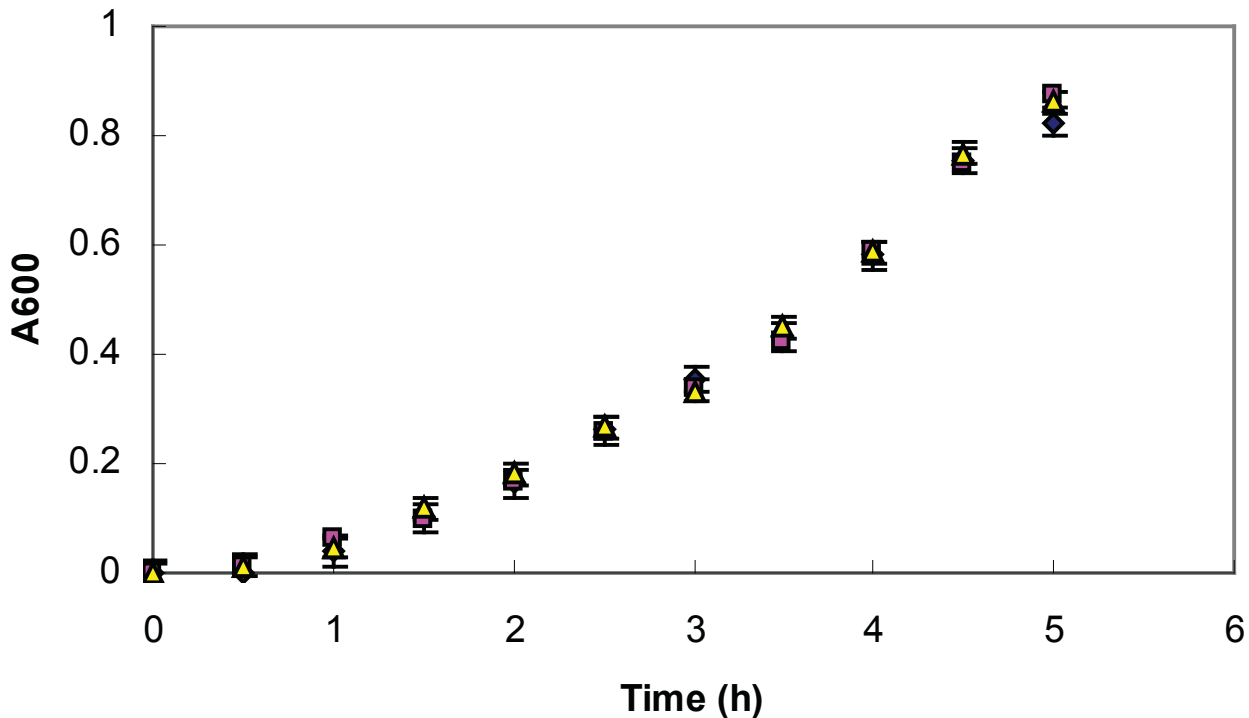

□ 20 μM morlin      ▲ 10 μM morlin      + Control 0 μM morlin

Supplementary material: Bacterial proliferation from 0-5 hours under 1, 10 and 20 μM conditions
