# Supplementary material
Source: PubMed Central journal article supplement (PMC1851581)

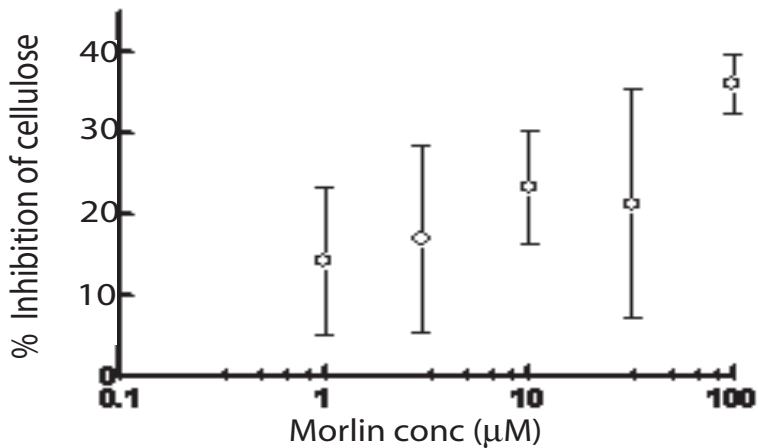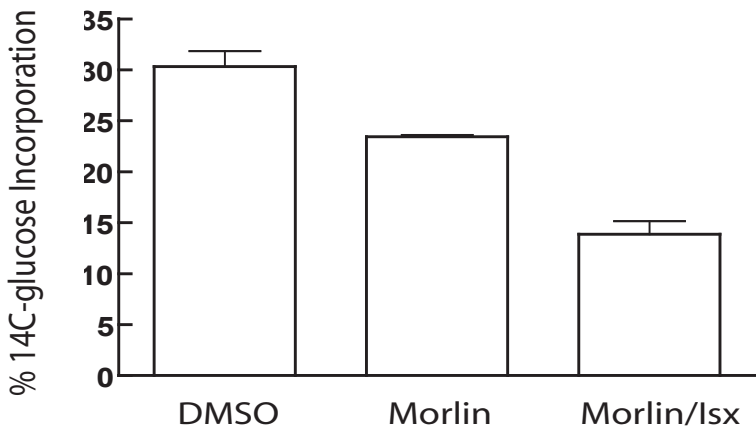

Supplement: pnas_0700789104_2.pdf [file pnas_0700789104_2.pdf]

No drug

Morlin

A

B

Anti-tubulin antibody

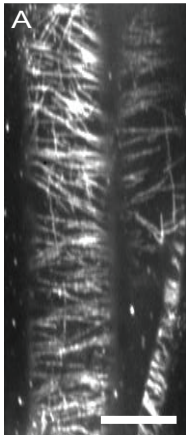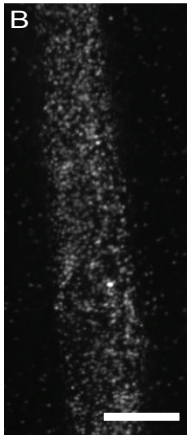

Supplement: pnas_0700789104_3.pdf [file pnas_0700789104_3.pdf]

(-) morlin

(+) morlin

Golgi

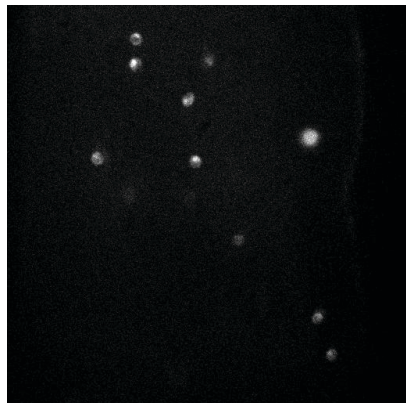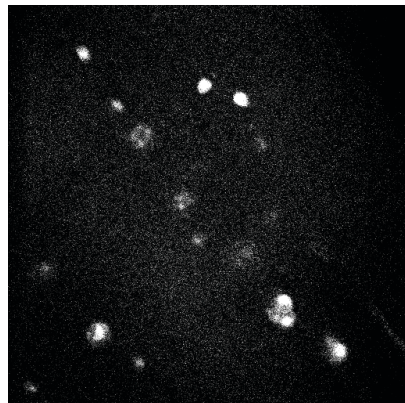

Actin

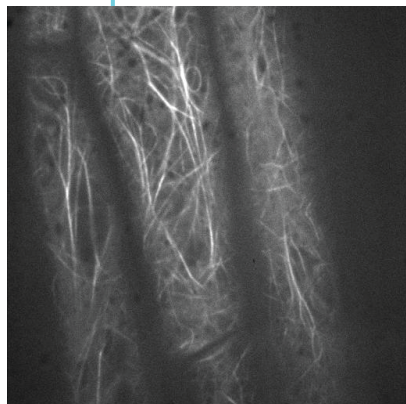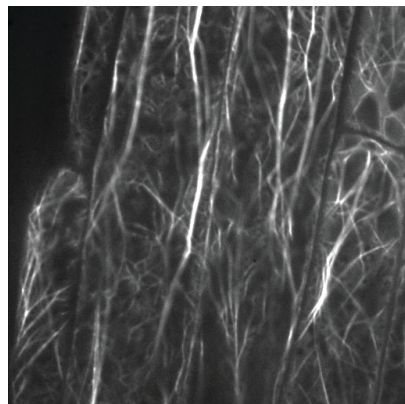

ER

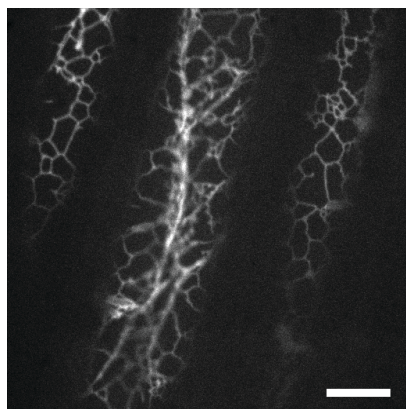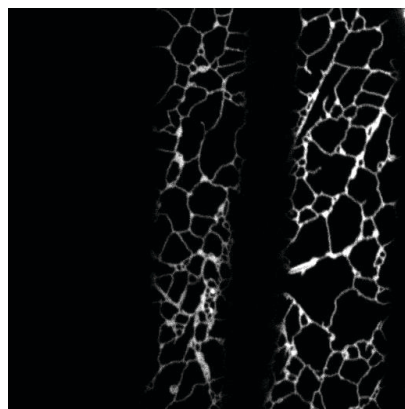

Supplement: pnas_0700789104_4.pdf [file pnas_0700789104_4.pdf]

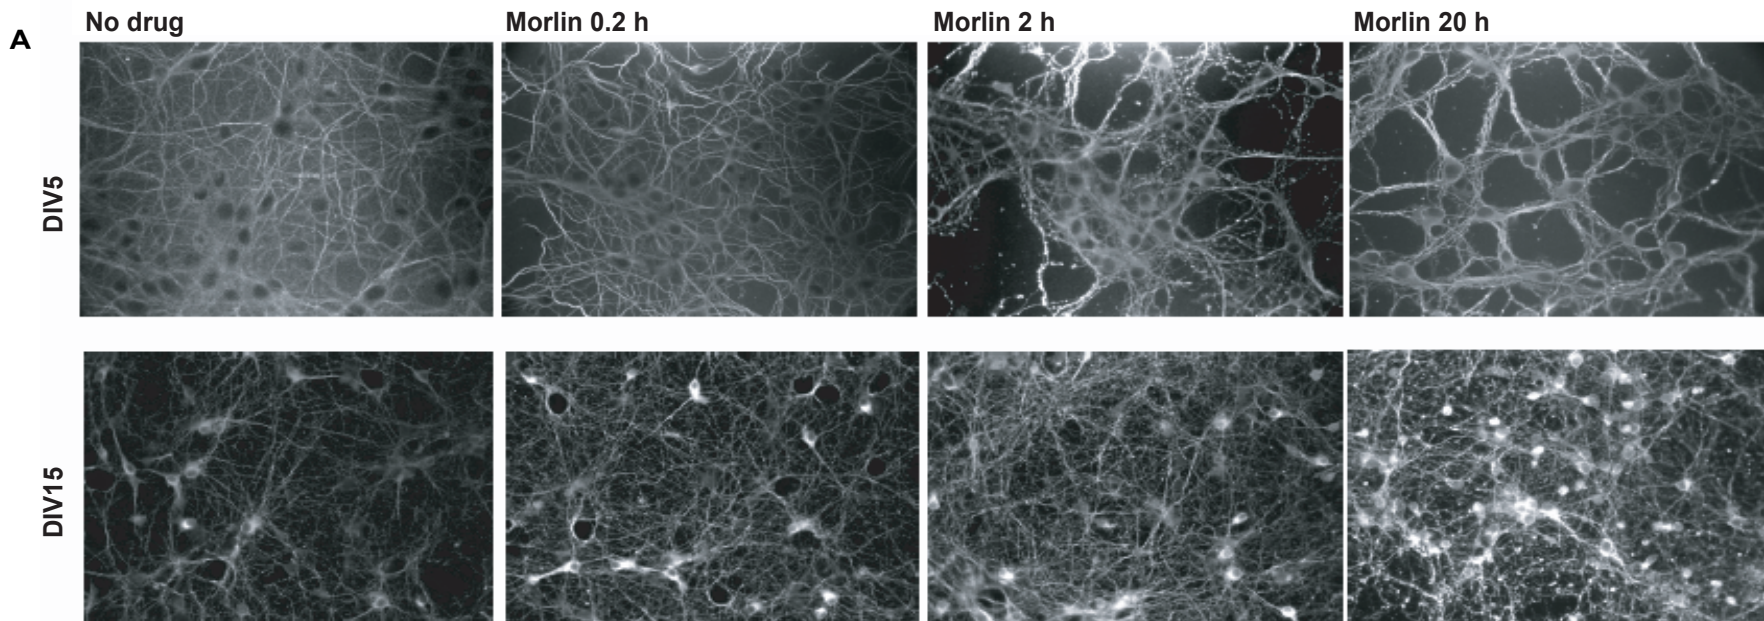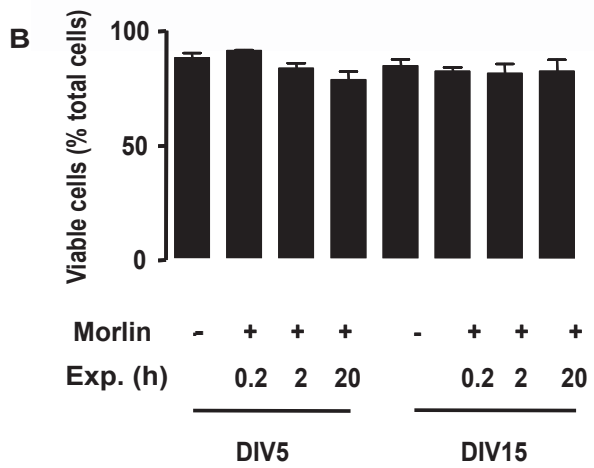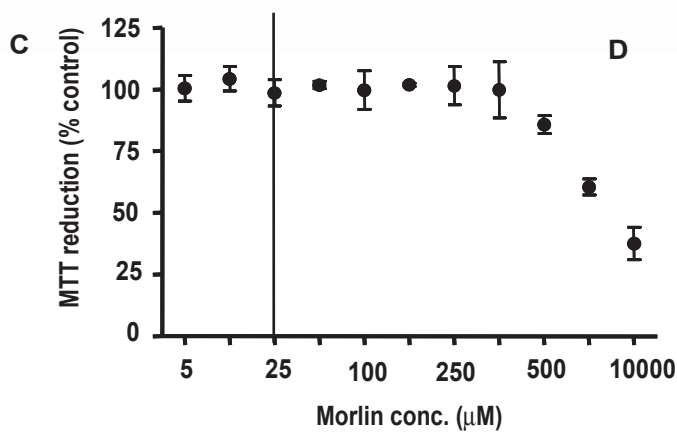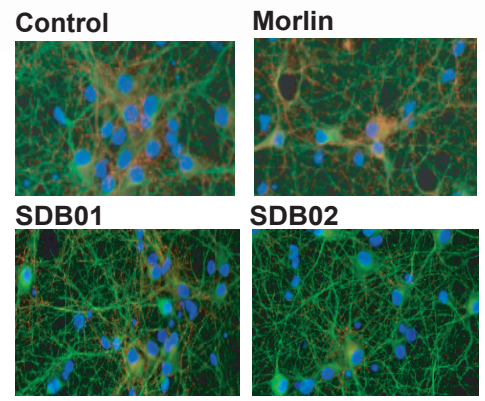

Supplement: pnas_0700789104_6.pdf [file pnas_0700789104_6.pdf]
